# Supplementary material for: Propofol Inhibits Glioma Stem Cell Growth and Migration and Their Interaction with Microglia via BDNF-AS and Extracellular Vesicles
Source: MDPI journal article supplement (doi:10.3390/cells12151921), 2023-07-25
Supplement: s1 [file s1]

## Supplementary figure legends

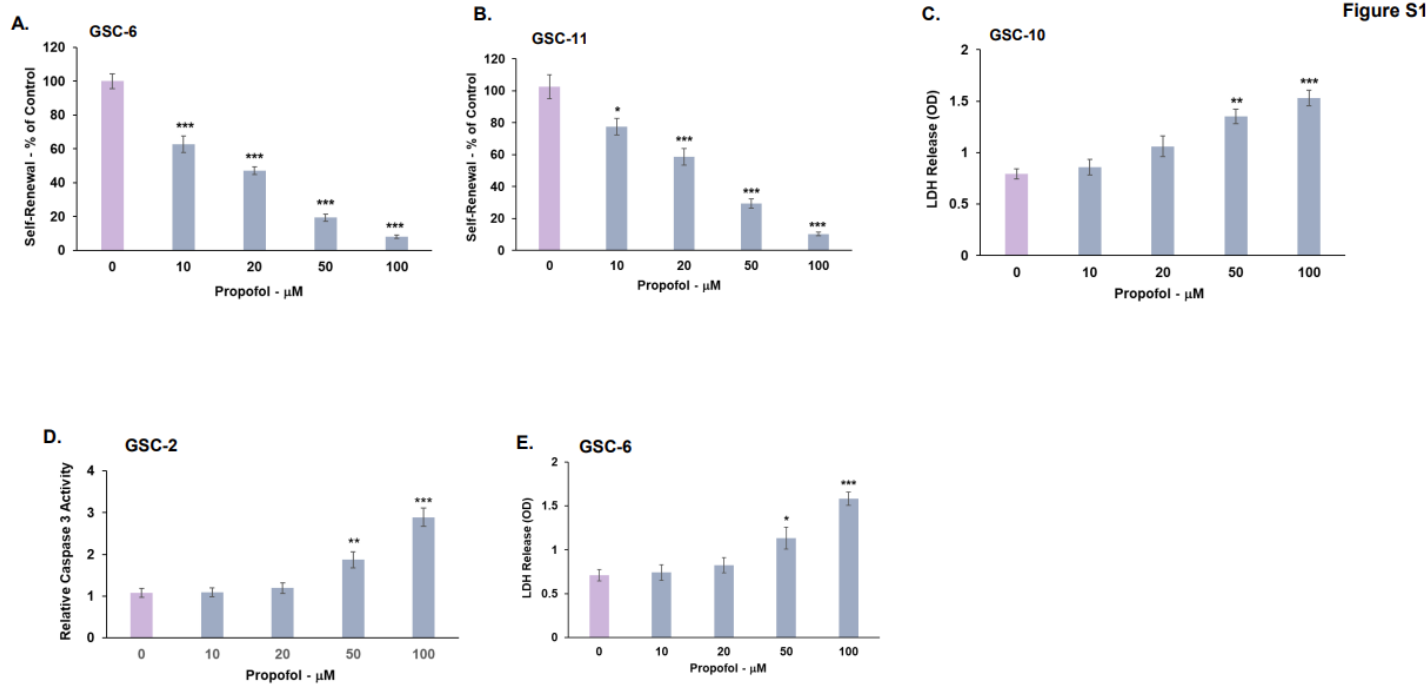

**Figure S1. Propofol effects on GSCs self-renewal and cell death.** GSC-6 (A) and GSC-11 (B) were plated at 100 cells/well in 96-well plates and treated with different propofol concentrations. The number of neurospheres per well was quantified after 14 days and presented as % of normalized control (A,B). Cell death was analyzed in GSC-10 (C) and GSC-2 (E) using LDH assay. Cell death is presented as relative average OD units. Cell apoptosis of propofol-treated GSC-2 was analyzed using caspase 3 activity (D). The results are presented as the means  $\pm$  SD of three separate experiments. \*P<0.05, \*\*P<0.01, \*\*\*P<0.001. Significance was determined by two-tailed unpaired Student's t-test.

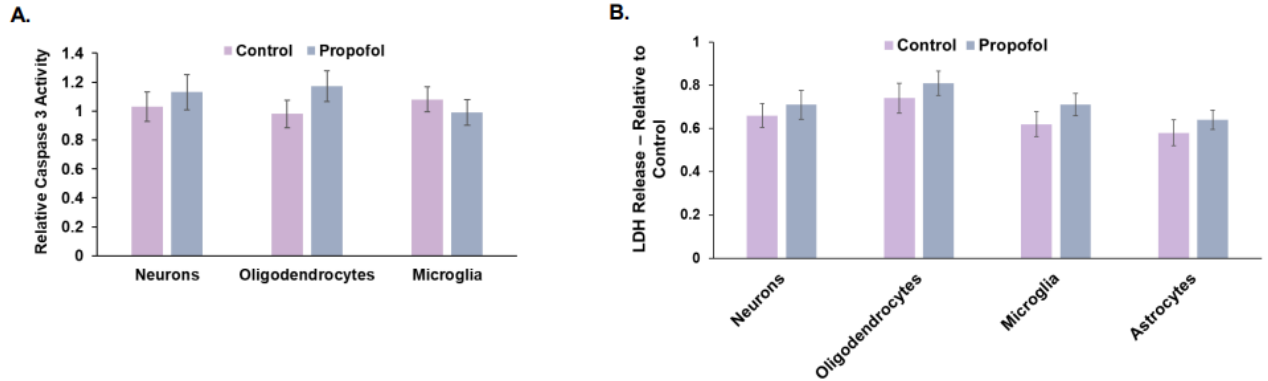

**Figure S2. Propofol does not exert cell death in human neural cells.** Human neurons, oligodendrocytes and microglia were cultured with 100  $\mu$ M propofol for 48 hr and cell apoptosis was analyzed using caspase 3 activity (A). Cell death of human neurons, oligodendrocytes, microglia and astrocytes was analyzed by LDH assay (B). The results are presented as the means  $\pm$  SD of three separate experiments. Significance was determined by two-tailed unpaired Student's t-test.

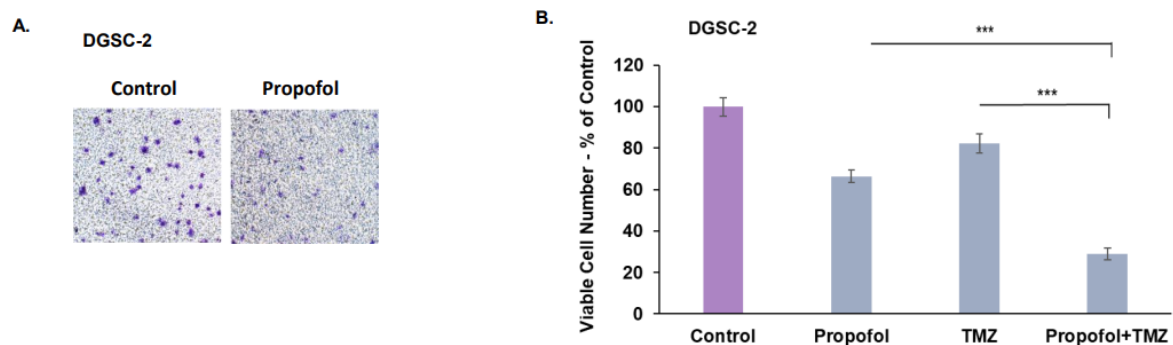

**Figure S3. Propofol inhibits migration and enhances the response of DGSC-2 to TMZ.** GSC-2 were differentiated in medium consisting of DMEM+10% FCS for a week. DGSC-2 were treated with propofol (20  $\mu$ M) and cell migration was analyzed using transwell plates with 8  $\mu$ m filter (A).

DGSC-2 were treated with propofol alone (10  $\mu$ M) or with TMZ (25  $\mu$ M). Cells proliferation was determined by determining cell number via trypan blue exclusion assay (B). Interaction analysis demonstrated a statistically significant interaction between propofol and TMZ that generated a synergistic inhibitory effect on cell proliferation,  $F(1, 12) = 39.452$ ,  $p < 0.0005$ ). The results represent as the means  $\pm$  SD of four different experiments. \*\*\* $P < 0.001$ . Significance was determined by two-tailed unpaired Student's t-test.

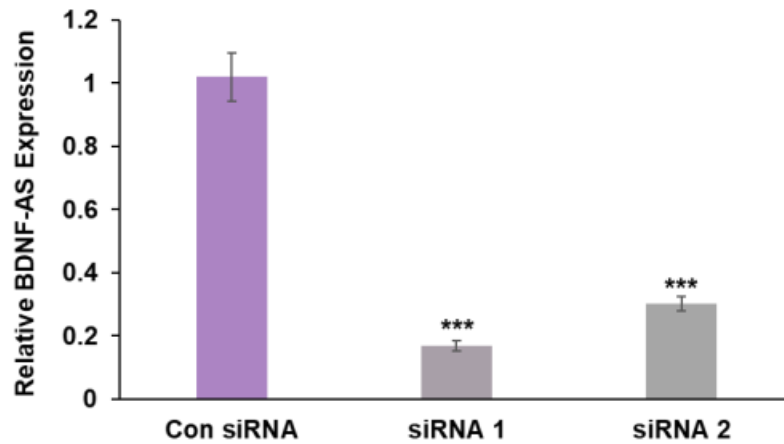

**Figure S4. Silencing of BDNF-As in GSCs.** GSC-10 were transfected with a control and two BDNF-AS siRNAs using siPORTER reagent. The expression of BDNF-AS was determined after 48 hr using RT-PCR. The results represent mean values  $\pm$  SD of three different experiments. \*\*\* $P < 0.001$ . Significance was determined by two-tailed unpaired Student's t-test.

Figure S5

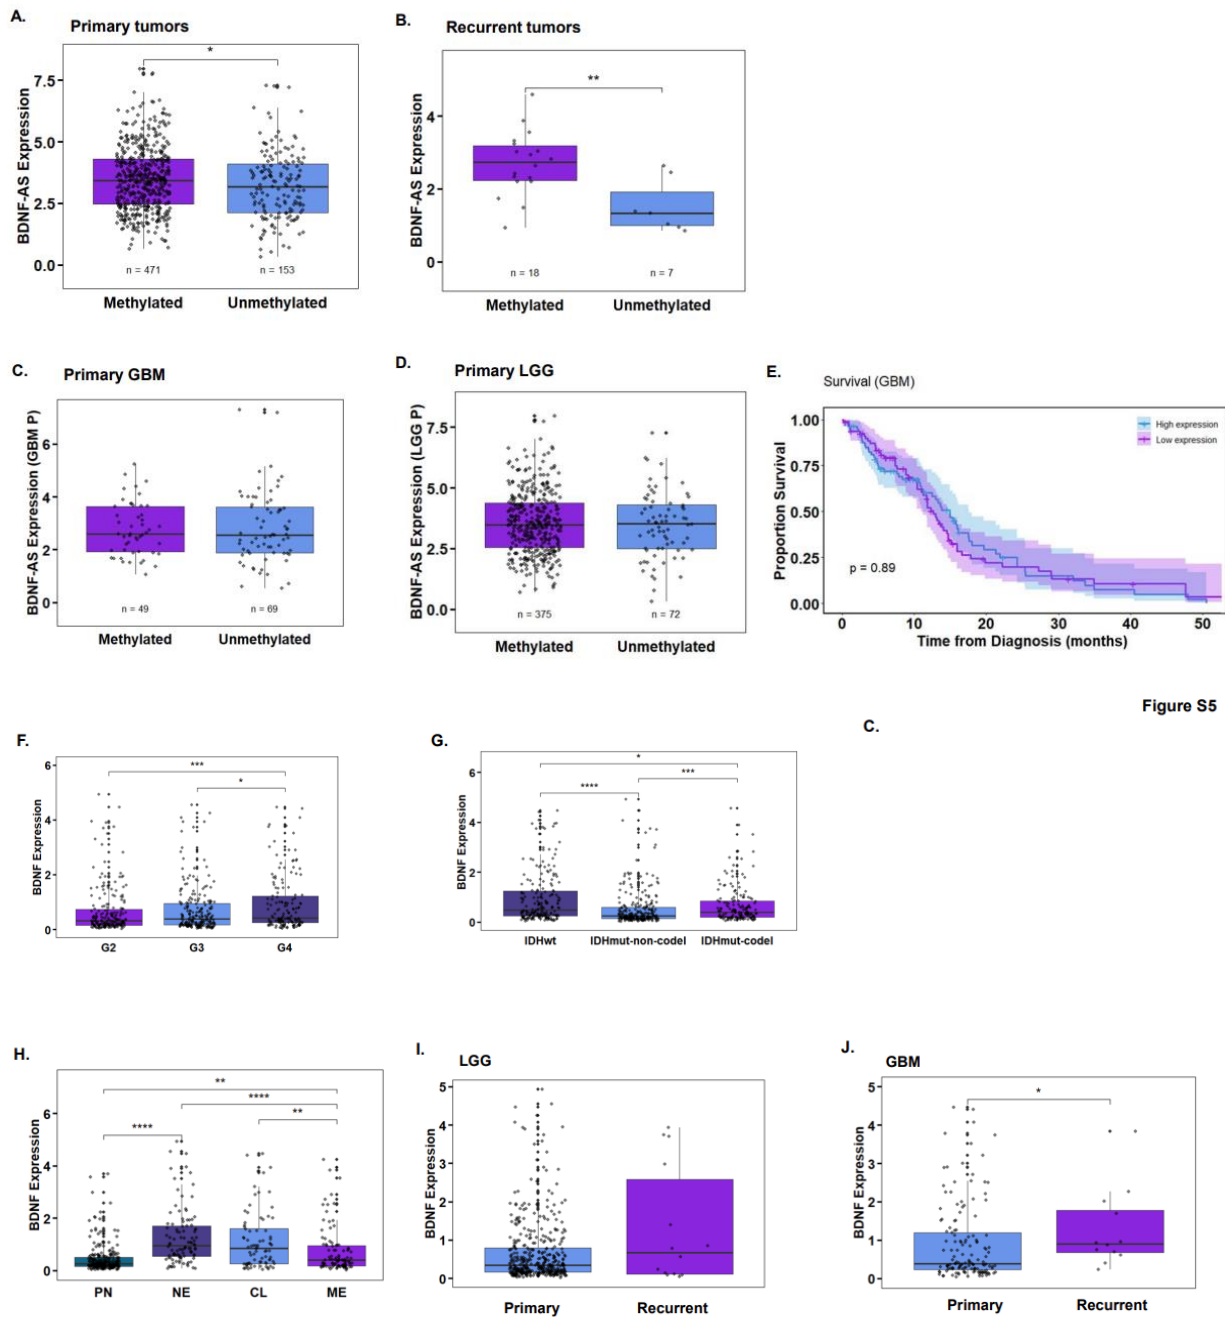

Figure S5

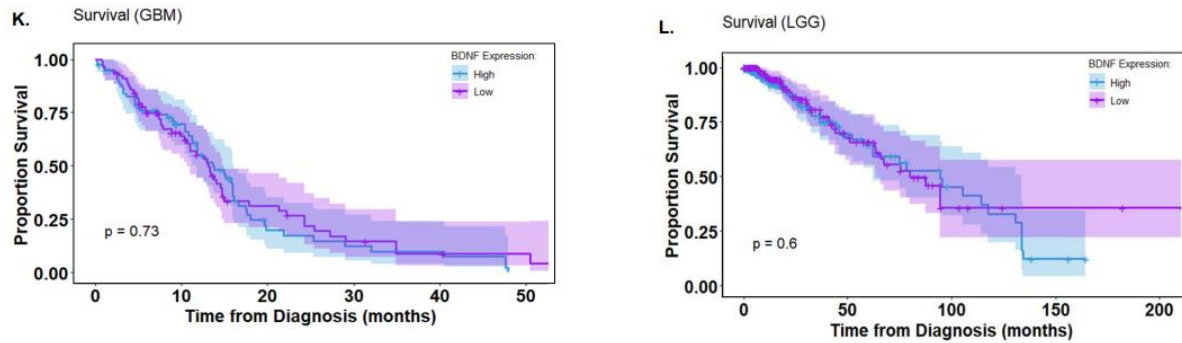

**Figure S5. Expression of BDNF in glioma tumors.** The expression of BDNF-AS was analyzed in primary (A) and recurrent (B) glioma (GBM+LGG) and in primary GBM (C) and LGG (D) MGMT methylated and unmethylated tumors. Kaplan-Meier estimates of overall survival are plotted for GBM patients according to BDNF-AS expression, log-rank  $P = 0.89$  (E). Relative expression of BDNF in LGG (G2,  $n=214$ ; G3,  $N=225$ ) and GBM (G4,  $n=158$ ) was determined according to The Cancer Genome Atlas (TCGA data portal, Wilcoxon t-test  $P<0.0001$ ) (F). BDNF expression was also determined in glioma tumors (GBM and LGG) by IDH status (IDH WT,  $n=217$ ; IDHmut-codel  $n=256$ ; IDHmut-non-codel,  $n=167$ , Wilcoxon t-test  $P<0.0001$ ) (G), and molecular subtypes (PN,  $n=242$ ; NE,  $n=100$ ; CL,  $n=80$ ; ME,  $n=90$ , Wilcoxon t-test  $P<0.001$ ) (H). The expression of BDNF in primary ( $n=144$ ) and recurrent ( $n=12$ ) LGG tumors,  $P<0.0001$  (I) and primary ( $n=425$ ) and recurrent ( $n=14$ ) GBM tumors (J) was also analyzed.

Kaplan-Meier estimates of overall survival are plotted for GBM patients according to BDNF expression, log-rank  $P = 0.73$ , (K) and LGG patients according to BDNF expression, log-rank  $P = 0.89$  (L).

Figure S6

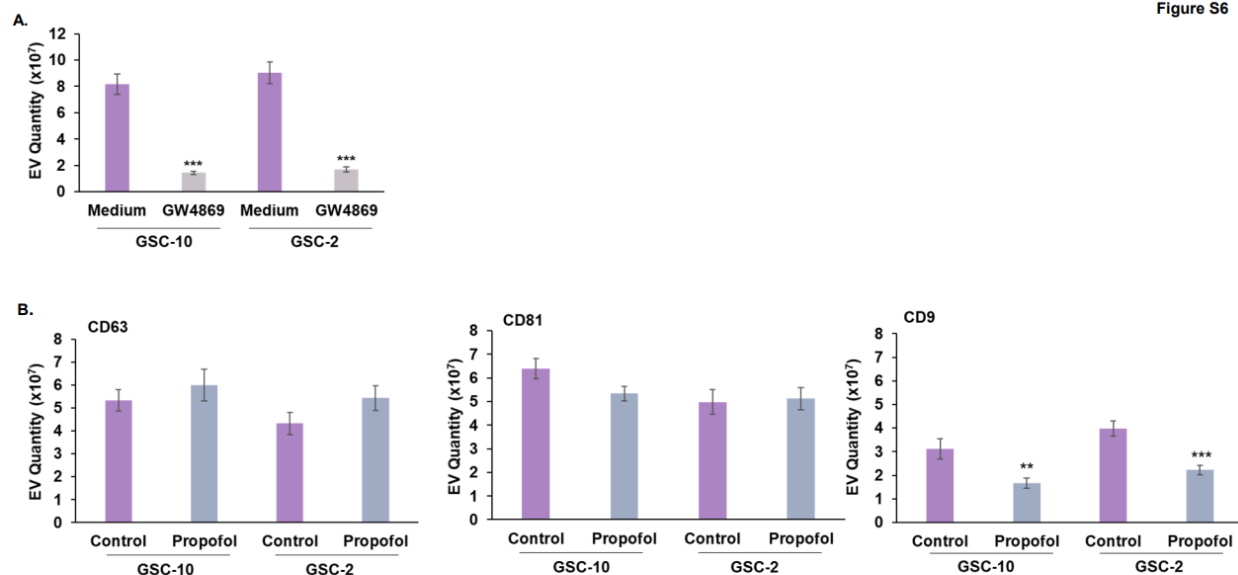

**Figure S6. Propofol effects on extracellular vesicle (EVs) secretion.** The effect of GW4869 (20  $\mu$ M) on EV secretion was analyzed in both GSC-10 and GSC-2 after 20 hr of treatment (A). GSC-10 and GSC-2 were treated with propofol 20  $\mu$ M for 24 hr. EVs were isolated using ExoQuick-TC Ultra kit and were analyzed for the relative expression of CD63, CD81 and CD9 using ELISA (B). The results represent mean values  $\pm$  SD of three different experiments. \*\* $P < 0.01$ , \*\*\* $P < 0.001$ . Significance was determined by two-tailed unpaired Student's t-test.

**Supplementary Table 1. De-identified patient information of GSCs**

| <b>Cell Line</b> | <b>Age@diagnosis (years)</b> | <b>Gender</b> | <b>OS (days)</b> | <b>MGMT</b> | <b>P53 mutation status</b> | <b>Mesenchymal markers</b> | <b>IDH status</b> |
|------------------|------------------------------|---------------|------------------|-------------|----------------------------|----------------------------|-------------------|
| <b>GSC-10</b>    | 39                           | F             | 717              | M           | wt                         | L                          | WT                |
| <b>GSC-2</b>     | 54                           | M             | 432              | M           | wt                         | H                          | WT                |
| <b>GSC-6</b>     | 54                           | F             | 339              | U           | R175H                      | H                          | WT                |
| <b>GSC-11</b>    | 45                           | M             | 646              | U           | M133T                      | L                          | WT                |

For each GSC, the age, gender, survival data, MGMT (U-unmethylated and M-methylated), IDH and p53 status are presented. Mesenchymal phenotypes of the GSCs were determined by the relative expression of YKL40, SMA and GTGF.

**Table S2****Sequences of primers used for RT-PCR**

|                                |                                    |                                  |
|--------------------------------|------------------------------------|----------------------------------|
| <b>BDNF</b>                    | <b>F:</b> GACAAGGCAACTTGGCCTAC     | <b>R:</b> CGTGTTTCGAAAGTGTCTAGCC |
| <b>BDNF-AS</b>                 | <b>F:</b> CCGTGAGAAGATCTCATTGGG    | <b>R:</b> CGTGCTCAAAAGTGTCTAGCC  |
| <b>TGF-<math>\beta</math>1</b> | <b>F:</b> CAAGCAGAGTACACACAGCAT    | <b>R:</b> TGCTCCACTTTTAACTTGAGCC |
| <b>CD44</b>                    | <b>F:</b> CTCCACCTGAAGAAGATTGT     | <b>R:</b> AAGATGTAAACCTCCTGAAGT  |
| <b>Vimentin</b>                | <b>F:</b> GCAAAGATTCCACTTTGCGT     | <b>R:</b> GAAATTGCAGGAGGAGATGC   |
| <b>OCT4</b>                    | <b>F:</b> ATCAGCCACATCGCCCAGCA     | <b>R:</b> CCCAGCAGCCTCAAAATCCT   |
| <b>Nanog</b>                   | <b>F:</b> ACCTATGCCTGTGATTTGTGG    | <b>R:</b> GTTGTTTGCCTTTGGGACTG   |
| <b>SOX2</b>                    | <b>F:</b> CCAGAAAAACAGCCCGGACC     | <b>R:</b> CGCTTCTCCGTCTCCGACAA   |
| <b>YKL40</b>                   | <b>F:</b> TGCCCTTGACCGCTTCCTCT     | <b>R:</b> TTGATGAAAGTCCGGCGACT   |
| <b>CTGF</b>                    | <b>F:</b> GTGTGCACCGCCAAAGATG      | <b>R:</b> CAACCACGGTTTGGTCCTTG   |
| <b>Twist1</b>                  | <b>F:</b> TAGAAGTCTGAACACTCGTT     | <b>R:</b> AATTCCTCTGATTGTTACCATT |
| <b>IL-10</b>                   | <b>F:</b> TCTCCGAGATGCCTTCAGCAGA   | <b>R:</b> TCAGACAAGGCTTGGCAACCCA |
| <b>CD86</b>                    | <b>F:</b> AGCCTTATCGGAAATGATCCAG   | <b>R:</b> GGCCTTGTAGACACCTTGGT   |
| <b>CD206</b>                   | <b>F:</b> CATCAGGGTGCAAGGAAGG      | <b>R:</b> GTCCAGGCACTGAAAGTGGA   |
| <b>S12</b>                     | <b>F:</b> TGCTGGAGGTGTAATGGACG     | <b>R:</b> CAAGCACACAAAGATGGGCT   |
| <b><math>\beta</math>2MG</b>   | <b>F:</b> TAAGTGGGATCGAGACATGTAAGC | <b>R:</b> CTAGAGCTACCTGTGGAGCA   |
